# Supplementary material for: Activated but functionally impaired memory Tregs are expanded in slow progressors to type 1 diabetes
Source: PubMed Central journal article supplement (PMC8741669; doi:10.1007/s00125-021-05595-0), 2021-10-28
Supplement: 125_2021_5595_MOESM1_ESM.pdf [file 125_2021_5595_MOESM1_ESM.pdf]

| ID     | Sex    | Age at current sample (years) | Time since mAb+ve (years) | Current GADA DK Units/ml | Current IA-2A DK units/ml | Current IAA units | Current ZnT8A units | Antibodies present at first mAb+ve sample | Stage of Diabetes Progression |
|--------|--------|-------------------------------|---------------------------|--------------------------|---------------------------|-------------------|---------------------|-------------------------------------------|-------------------------------|
| SP 606 | Male   | 72.6                          | 32                        | 53.929                   | 0.000                     | 0.000             | 34.525              | GADA, IA-2A, ZnT8A                        | Stage 3                       |
| SP 607 | Male   | 49.1                          | 30.8                      | 34.323                   | 0.000                     | 0.000             | 0.851               | GADA, ZnT8A                               | Stage 1                       |
| SP 608 | Female | 47.1                          | 30.4                      | 176.307                  | 23.100                    | 0.000             | 3.862               | GADA, IA-2A, ZnT8A                        | Stage 2                       |
| SP 609 | Male   | 33.5                          | 26.2                      | 114.170                  | 0.275                     | 0.000             | 1.481               | GADA, IAA                                 | Stage 1                       |
| SP 610 | Female | 40.6                          | 25.6                      | 4.524                    | 35.430                    | 0.000             | 0.361               | GADA, IA-2A, ZnT8A                        | Stage 1                       |
| SP 611 | Male   | 56.3                          | 18.6                      | 1026.042                 | 4.791                     | 1.640             | 0.435               | GADA, IAA                                 | Stage 1                       |
| SP 612 | Male   | 31.2                          | 18.2                      | 319.394                  | 0.000                     | 0.000             | 0.312               | GADA, IAA                                 | Stage 1                       |
| SP 613 | Male   | 31.7                          | 18.6                      | 143.477                  | 6.748                     | 0.000             | 4.670               | GADA, IA-2A, ZnT8A                        | Stage 1                       |

ESM Table 1. Current islet autoantibody results for 8 slow progressors. The positive thresholds for GADA are  $\geq 33$  DK units/ml, IA-2A are  $\geq 1.4$  DK units/ml, IAA are  $\geq 0.2$  units and ZnT8 are  $\geq 1.8$  units.

| ID     | DRB1 (allele 1) | DRB1 (allele 2) | DQB1 (allele 1) | DQB1 (allele 2) | Genotype        | Level of genetic risk |
|--------|-----------------|-----------------|-----------------|-----------------|-----------------|-----------------------|
| SP 606 | 04              | 12              | 0301            | 0302            | DR4-DQ8/X       | Moderate              |
| SP 607 | 15              | 04              | 0302            | 0601            | DR4-DQ8/X       | Moderate              |
| SP 608 | 04              | 11              | 0301            | 0302            | DR4-DQ8/X       | Moderate              |
| SP 609 | 03              | 04              | 0201            | 0302            | DR3-DQ2/DR4-DQ8 | High                  |
| SP 610 | 04              | 04              | 0301            | 0302            | DR4-DQ8/DR4-DQ7 | Moderate              |
| SP 611 | 04              | 07              | 02              | 0302            | DR4-DQ8/X       | Moderate              |
| SP 612 | 01              | 03              | 02              | 0501            | DR3-DQ2/X       | Moderate              |
| SP 613 | 03              | 04              | 0201            | 0302            | DR3-DQ2/DR4-DQ8 | High                  |

ESM Table 2. Table of genetic information for 8 slow progressors.

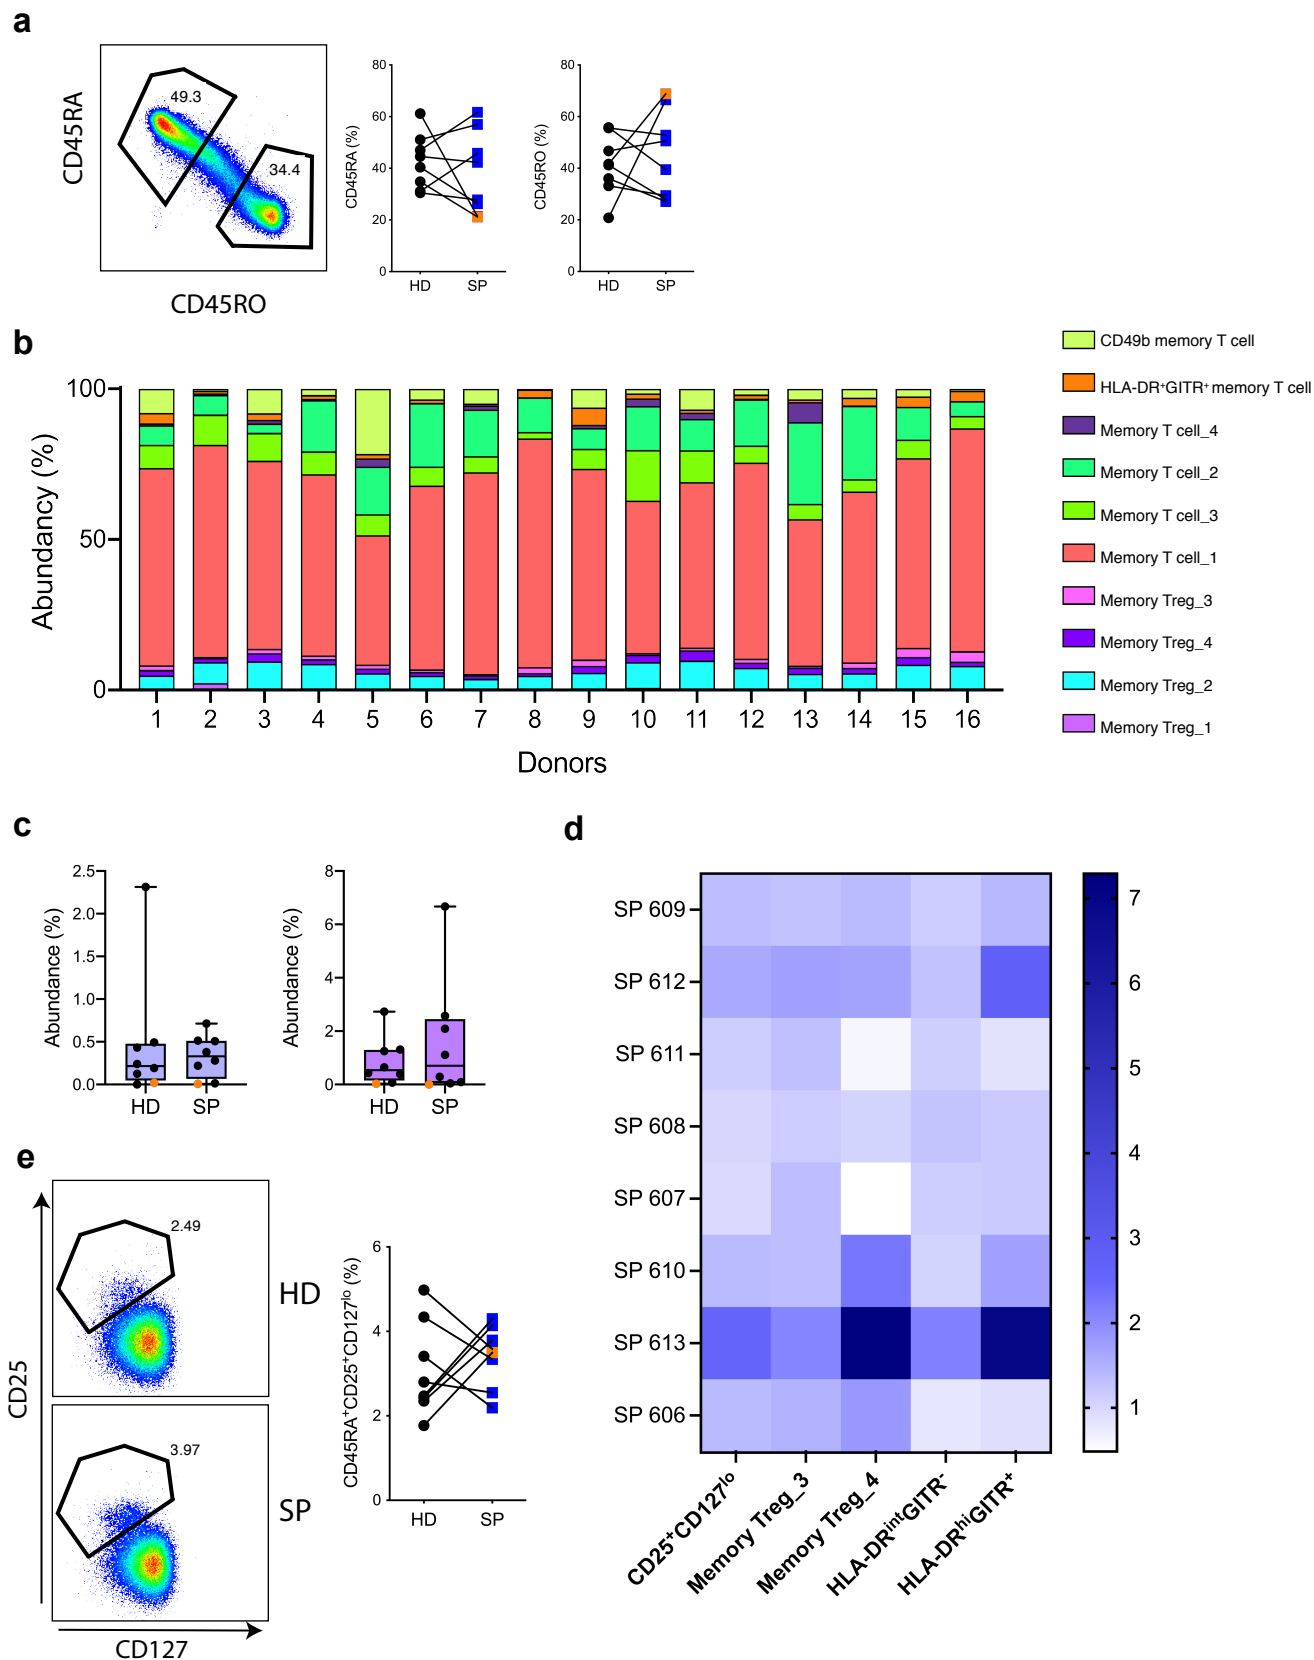

**ESM Figure 1. Treg metaclusters in slow progressors.** (a) Gating (left) and summary graphs for CD45RA (middle) and CD45RO (right) CD4<sup>+</sup> T cells in slow progressors, matched to healthy donors. (b) CD45RA<sup>+</sup>Treg metaclusters (Memory T cell\_1; Memory T cell\_2; Memory T cell\_3; Memory T cell\_4; CD49b memory T cell; HLA-DR<sup>hi</sup>GITR<sup>+</sup> memory T cell; Memory Treg\_1; Memory Treg\_2; Memory Treg\_3; Memory Treg\_4) defined in each donor (n=16). (c) Memory Treg\_1 (left) and Memory T cell\_4 (right) box-plots (mean <math><0.05\%</math>). (d) Heatmap showing expression ratio (SP/HD) of defined Treg metaclusters Memory Treg\_3 and Memory Treg\_4 along with hierarchical gating emulating both Treg metaclusters for each individual slow progressor donor. (e) Gating to show CD25<sup>+</sup>CD127<sup>lo</sup> Treg cells in the CD45RA CD4<sup>+</sup> T cell compartment and summary graph showing no difference in naive Tregs.

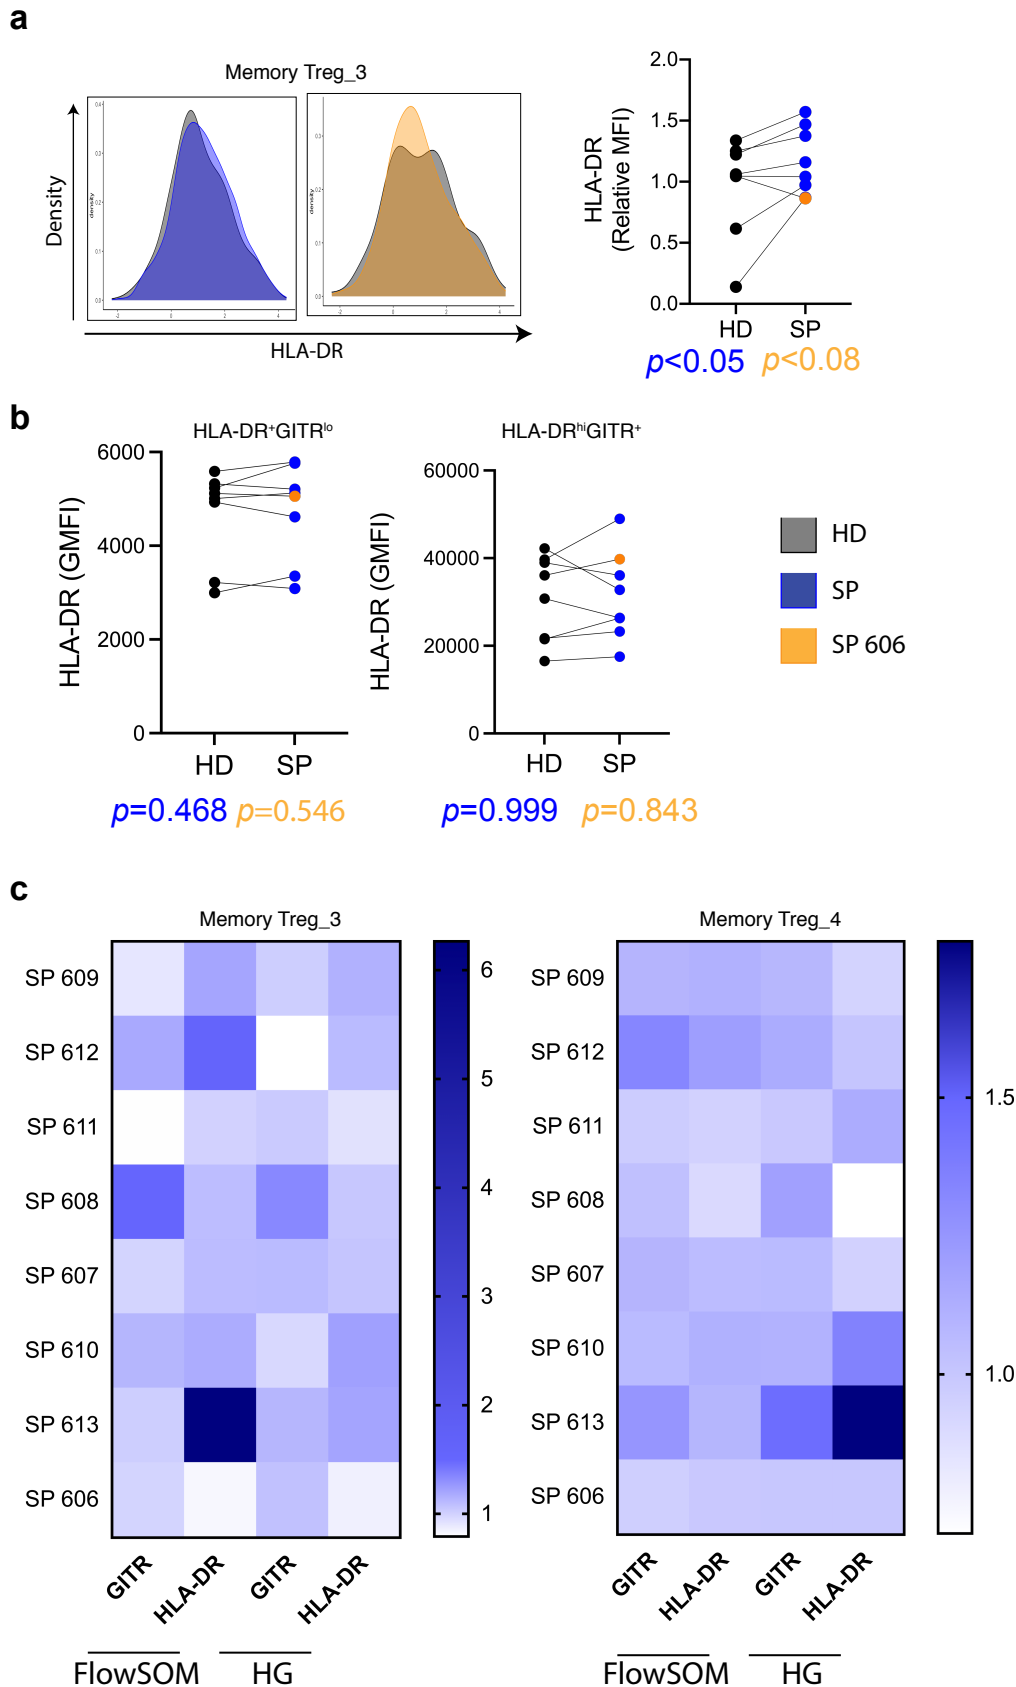

**ESM Figure 2. HLA-DR expression in Memory Treg\_3 and Memory Treg\_4 metaclusters.** Memory Treg\_3 metacluster from FLOW SOM, was examined for a change in HLA-DR expression marker. (a) FlowSOM HLA-DR expression concatenated from all HD (grey), all SP (blue) and SP 606 (orange) showing histograms (left) and summary graph (right). (b) Summary graphs of HLA-DR expression, from hierarchical gating in both HLA-DR<sup>+</sup>GITR<sup>lo</sup> and HLA-DR<sup>hi</sup>GITR<sup>+</sup> Tregs (a, b) Wilcoxon matched-pairs signed rank test,  $p$ -value in orange is all donors included,  $p$ -value in blue is without donor SP 606 and matched HD not included in test. (c) Heatmap showing expression GITR and HLA-DR ratios (SP/HD), for each individual slow progressor donor, in defined Treg metaclusters or subsets defined by hierarchical gating: Memory Treg\_3 (HLA-DR<sup>+</sup>GITR<sup>lo</sup>) and Memory Treg\_4 (HLA-DR<sup>hi</sup>GITR<sup>+</sup>).

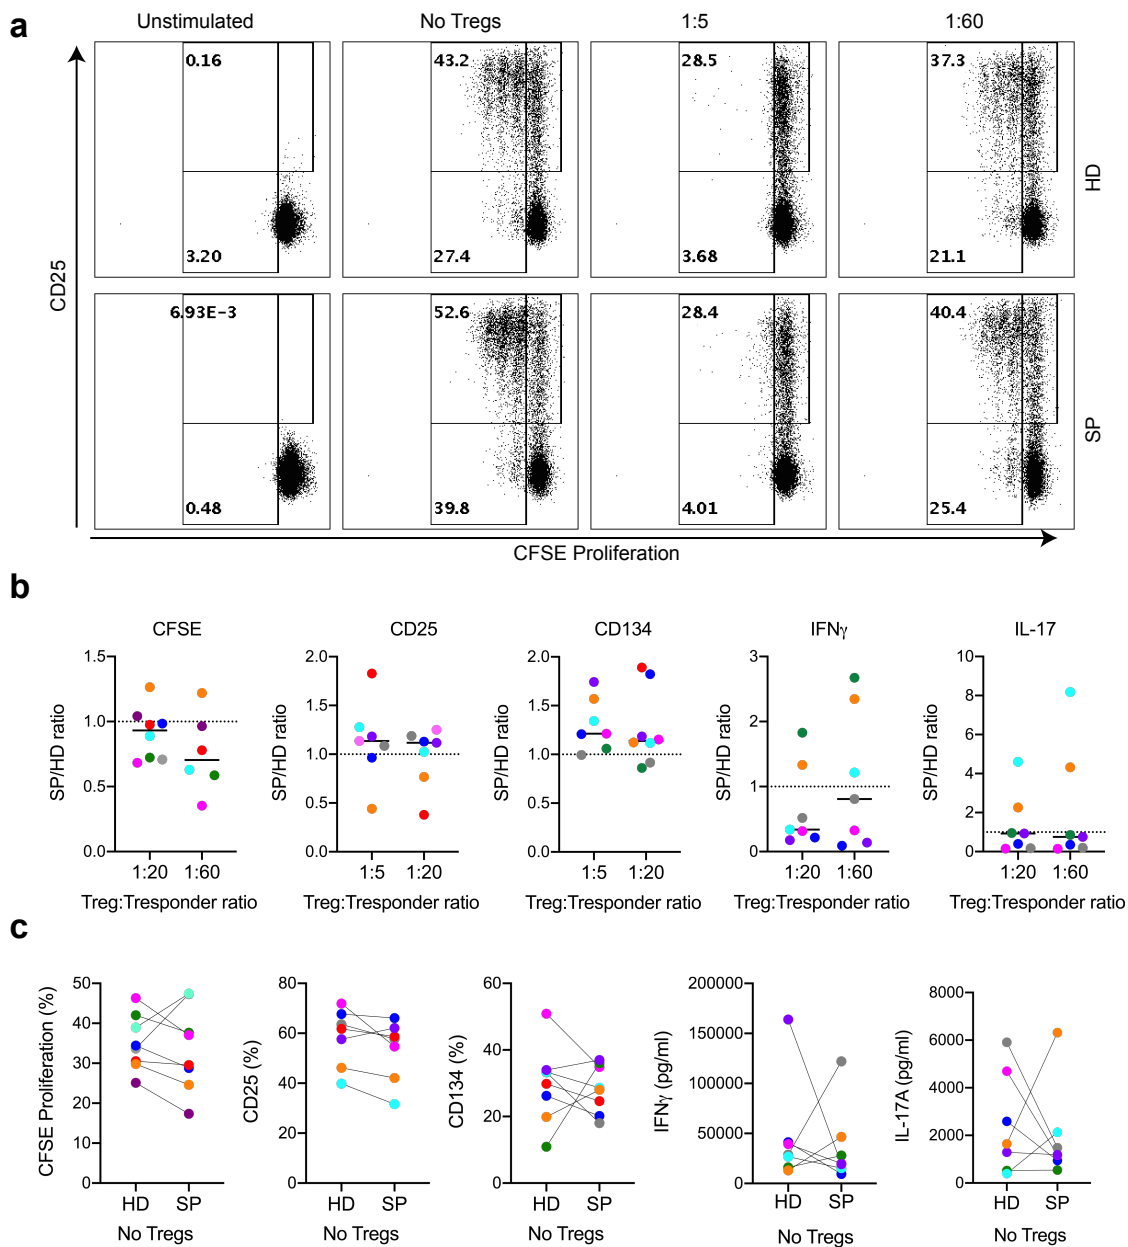

**ESM Figure 3. Treg suppression in slow progressors** (a) Representative flow plots for Treg suppression assay showing CFSE and CD25 gating on both slow progressor donor (SP) and matched healthy donor (HD). Unstimulated control, no Tregs (positive control) Treg:responder ratios 1:5 and 1:60 are shown (b) SP/HD ratios for CFSE, CD25, CD134, IFN $\gamma$  and IL-17 when autologous Tregs and responders are cultured. (c) Response of CD4 effector T cells to polyclonal stimuli anti-CD3/28 for each individual slow progressor donor matched to healthy controls.



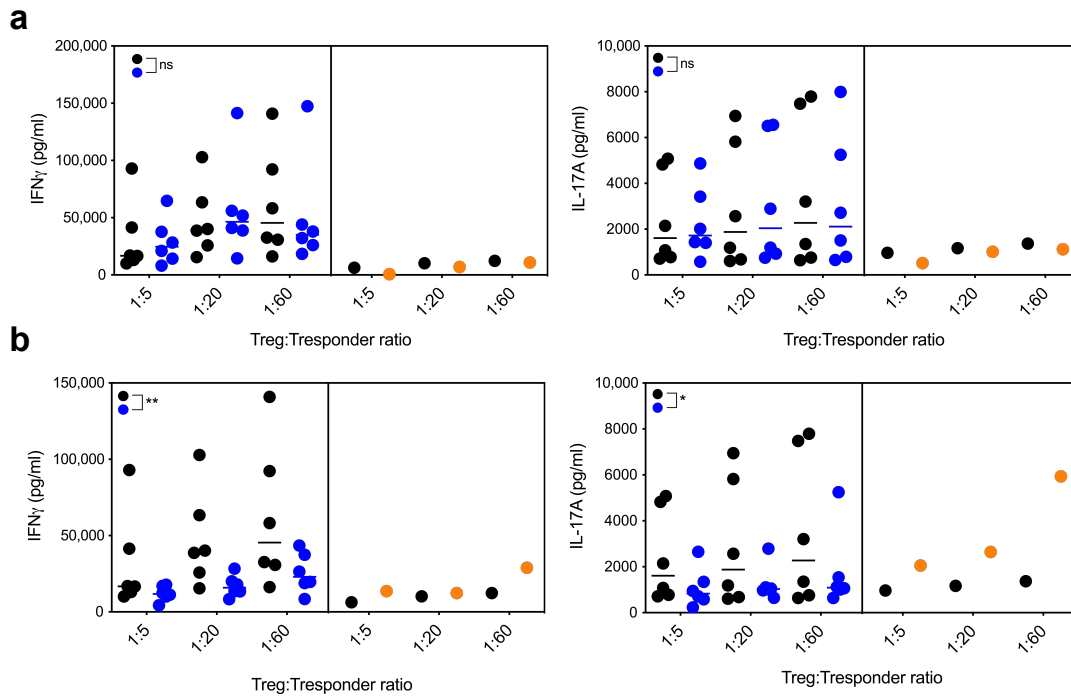

**ESM Figure 4. Proinflammatory cytokine responses in Treg suppression assay.** (a) HD responders were co-cultured with Tregs from matched healthy donors and slow progressors or SP 606. (b) autologous Treg: T responder assays (HD Tregs:HD responders; SP Tregs:SP responders). IFN $\gamma$  (left) and IL-17 (right) production measured by Meso Scale Discovery. Healthy donor (HD, black dots), HD 606 plotted separately and slow progressors (SP, blue dots) or SP 606 donor (orange dots). ns, not-significant, \*\*<0.01, \*<0.05, repeated measures-two-way ANOVA.
